# Supplementary material for: PLEK2 promotes gallbladder cancer invasion and metastasis through EGFR/CCL2 pathway
Source: PubMed Central journal article supplement (PMC6558801; doi:10.1186/s13046-019-1250-8), 2019-06-10

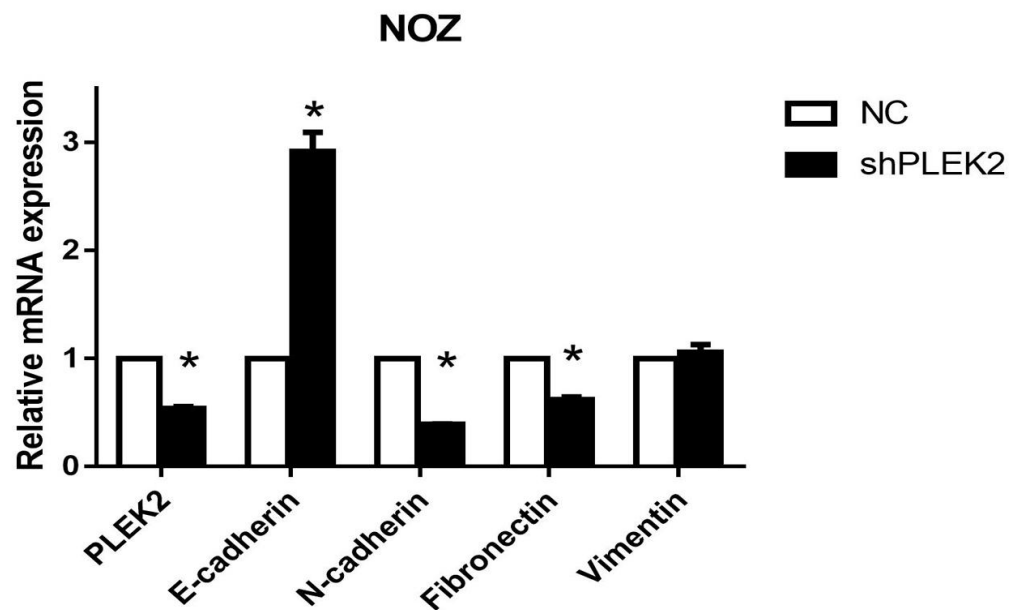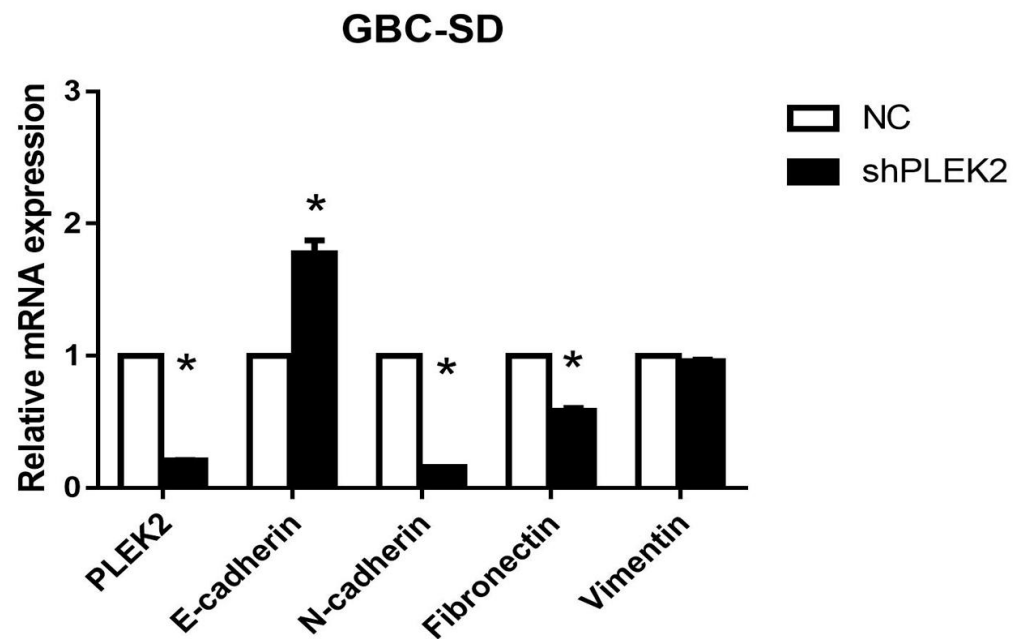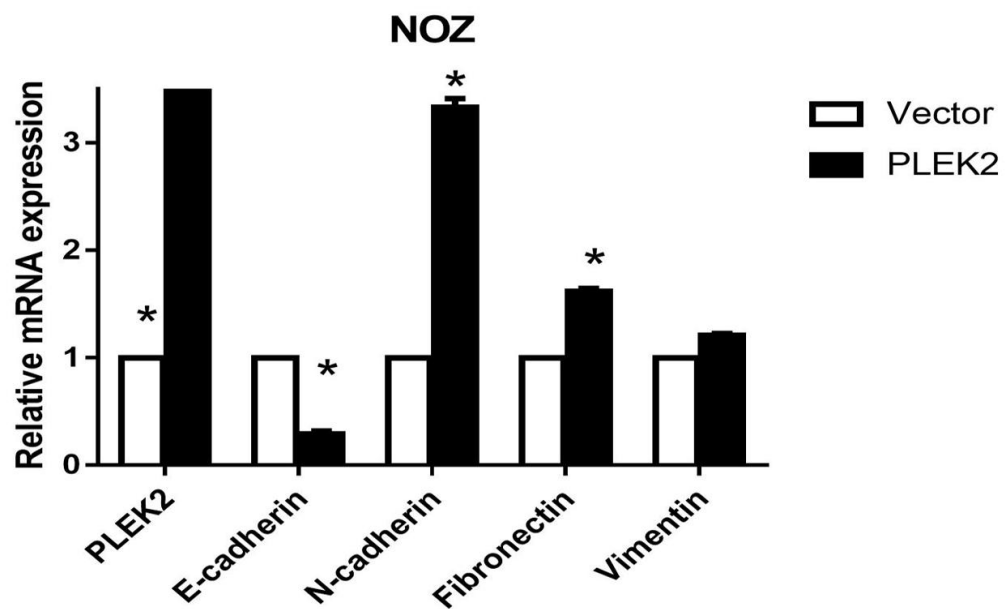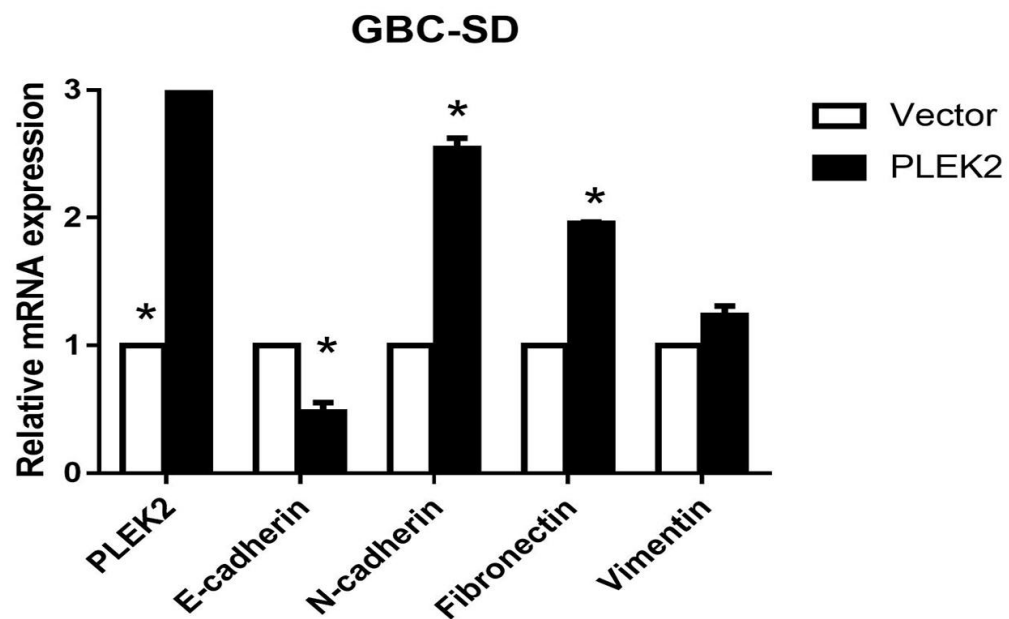

Supplement: 13046_2019_1250_MOESM4_ESM.pdf [file 13046_2019_1250_MOESM4_ESM.pdf]
