# Supplementary material for: PLEK2 promotes gallbladder cancer invasion and metastasis through EGFR/CCL2 pathway
Source: PubMed Central journal article supplement (PMC6558801; doi:10.1186/s13046-019-1250-8), 2019-06-10
Supplement: 13046_2019_1250_MOESM8_ESM.pdf [file 13046_2019_1250_MOESM8_ESM.pdf]

# NOZ

**EGFR**

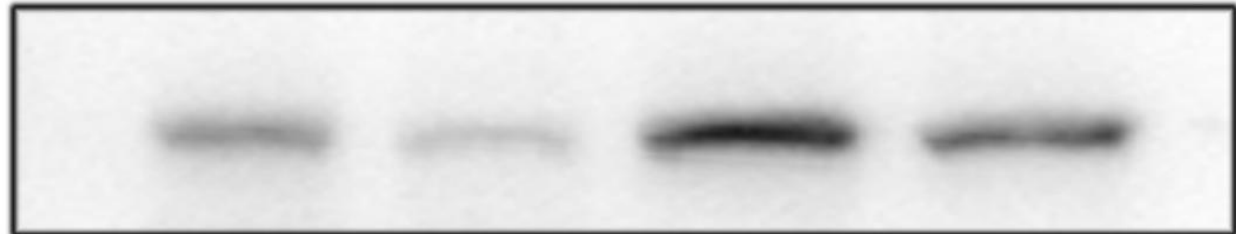

**Flag-c-CBL**

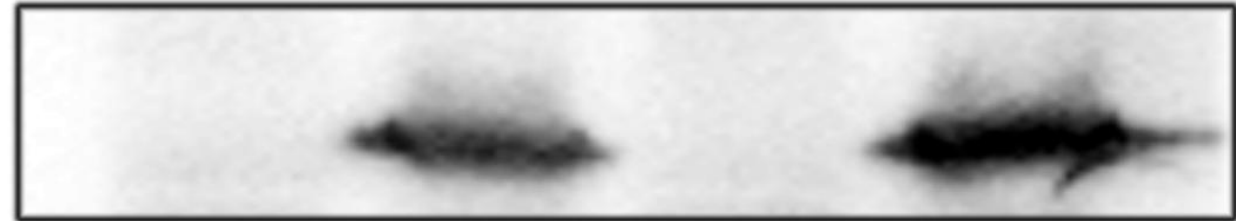

**PLEK2**

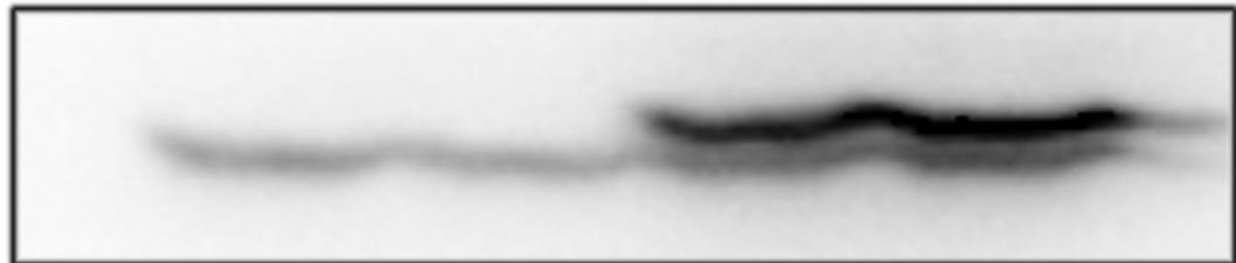

**$\beta$ -actin**

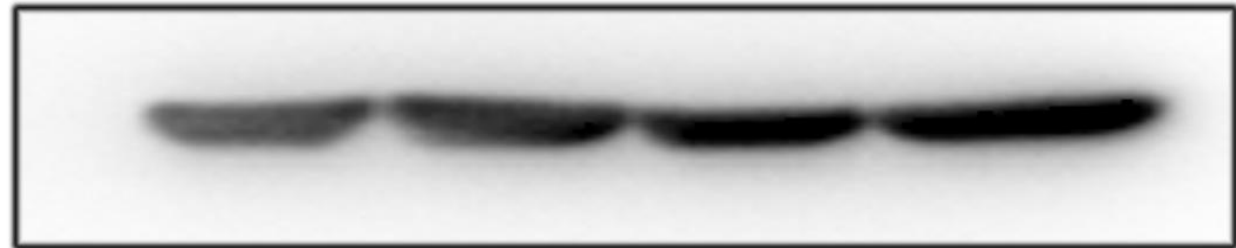

**Flag-PLEK2**

-      -      +      +

**Flag-c-CBL**

-      +      -      +
