# Supplementary material for: PLEK2 promotes gallbladder cancer invasion and metastasis through EGFR/CCL2 pathway
Source: PubMed Central journal article supplement (PMC6558801; doi:10.1186/s13046-019-1250-8), 2019-06-10

**A**

**200X**

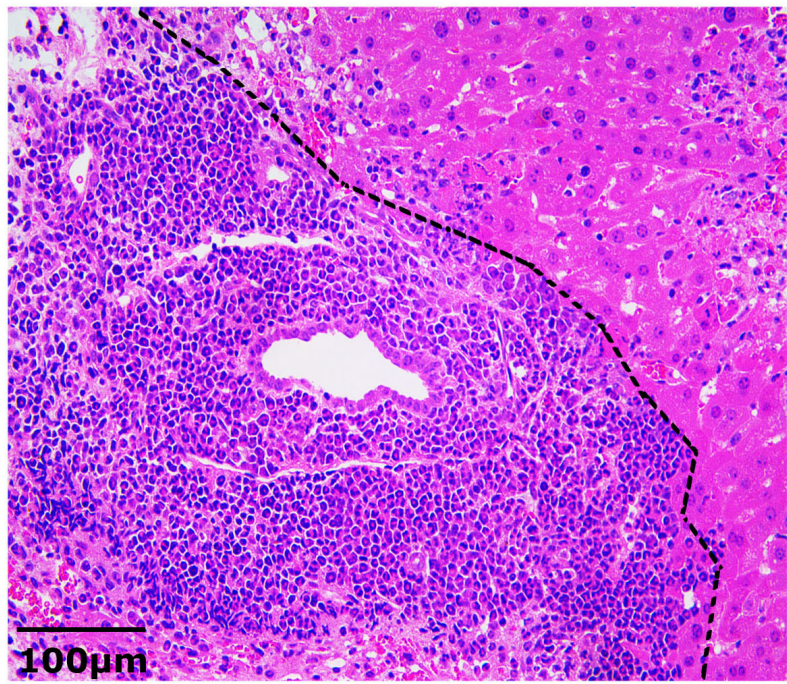

**B**

**200X**

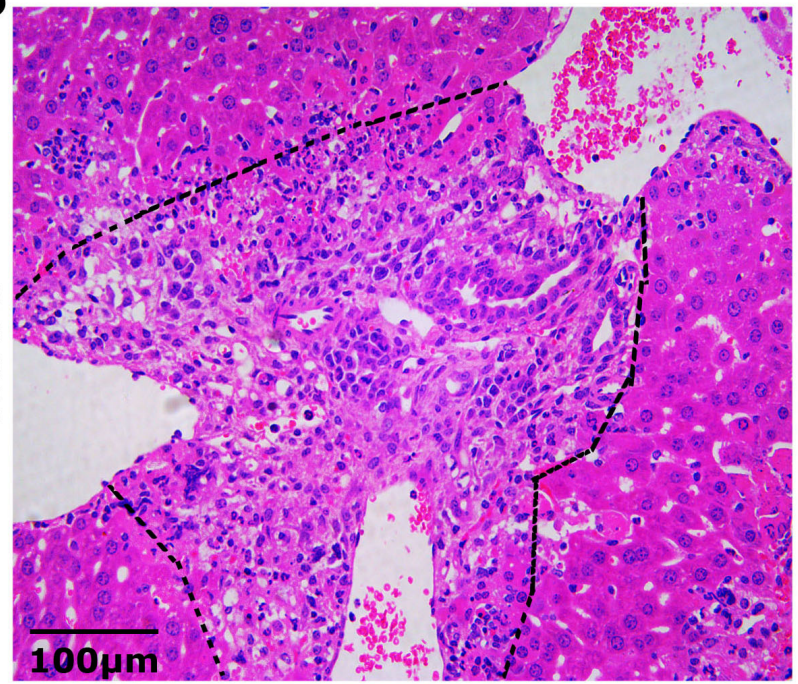

**C**

**200X**

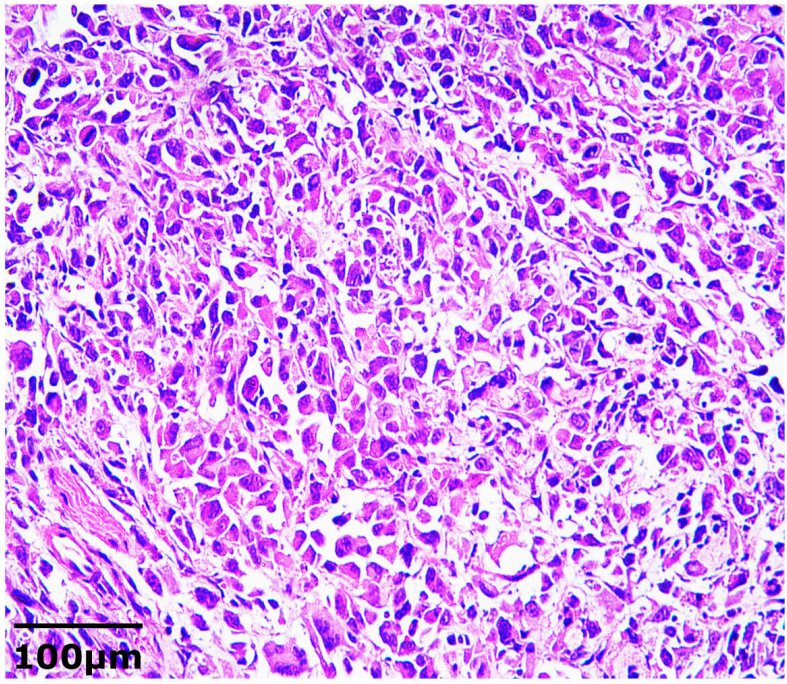

Supplement: 13046_2019_1250_MOESM9_ESM.pdf [file 13046_2019_1250_MOESM9_ESM.pdf]
